# Supplementary material
Source: publisher figshare collection journal article supplement (https://sage.figshare.com/ndownloader/files/18531179)
Supplement: Supplementary file 1 [file 18531179]

| Themes and concepts                                                   | Action research | Case study | Cross-sectional <sup>1</sup>      | Longitudinal-observational | Pre-test, post-test, no control | Quasi-experimental (not random) | True experiment | Mixed  |
|-----------------------------------------------------------------------|-----------------|------------|-----------------------------------|----------------------------|---------------------------------|---------------------------------|-----------------|--------|
| Work ethic (n = 32)                                                   | n = 1           | n = 1      | n = 19                            | n = 4                      | n = 2                           | n = 1                           | n = 1           | n = 3  |
| Work ethic                                                            |                 |            | 47                                | 25                         |                                 |                                 |                 |        |
| (Self-)discipline                                                     |                 |            | 15, 24, 33, 47, 53, 64, 70, 85    | 25                         |                                 |                                 |                 |        |
| Assertiveness                                                         |                 |            | 33, 70                            | 30                         | 36                              |                                 | 3               |        |
| Initiative                                                            |                 | 52         | 14, 45, 70                        |                            |                                 |                                 |                 |        |
| Effort                                                                | 4               |            | 10, 49, 70                        | 25                         | 7                               | 35                              |                 | 75     |
| Commitment                                                            |                 |            | 24, 32, 33, 54, 55, 73            | 25, 48                     |                                 |                                 |                 |        |
| Be though, not giving up                                              | 4               |            | 10                                |                            |                                 |                                 |                 |        |
| Perseverance                                                          |                 |            | 16, 17, 24, 33, 82a, 85           | 25, 67                     |                                 |                                 |                 |        |
| Focus, concentration                                                  |                 |            | 85                                | 25, 48, 67                 |                                 |                                 |                 |        |
| Independence                                                          |                 |            | 33                                | 25                         |                                 |                                 |                 |        |
| Self-direction                                                        |                 |            | 70                                |                            |                                 |                                 |                 | 37, 88 |
| Control and management (n = 37)                                       |                 | n = 1      | n = 20                            | n = 5                      | n = 2                           | n = 2                           | n = 4           | n = 3  |
| Assuming control                                                      |                 |            | 21                                | 48                         |                                 |                                 |                 |        |
| Coping strategies/skills                                              |                 |            |                                   | 57                         |                                 |                                 | 56              |        |
| Internal control or self-control                                      |                 |            | 38, 46, 50                        | 25, 30, 72                 | 7, 71                           | 35                              | 39              | 27, 37 |
| Managerial skills (e.g. being organized)                              |                 |            | 60                                |                            |                                 |                                 |                 | 75     |
| Self-management                                                       |                 |            | 20, 38, 63                        |                            |                                 |                                 |                 |        |
| Time management (skills) (e.g. being on time, planning, prioritizing) |                 | 52         | 18, 20, 24, 33, 46, 50, 85, 86    | 25                         |                                 |                                 |                 |        |
| Emotional control/regulation (e.g. managing feelings)                 |                 |            | 9, 10, 14, 21, 45, 47, 50, 53, 86 |                            |                                 |                                 | 44              |        |
| Handling failure                                                      |                 |            | 10                                | 57                         |                                 |                                 |                 |        |
| Resilience                                                            |                 |            | 33, 54, 55                        | 57                         |                                 | 65                              |                 |        |
| Managing or overcoming stress                                         |                 |            | 21, 33, 46, 47, 85                | 57                         |                                 |                                 |                 |        |
| Social (self-) control                                                |                 |            |                                   |                            |                                 |                                 | 3, 44           |        |
| Resisting problem behaviours and peer pressure                        |                 |            | 24, 38                            |                            |                                 |                                 |                 |        |
| Goal-setting (n = 14)                                                 |                 | n = 2      | n = 7                             | n = 3                      |                                 |                                 | n = 1           | n = 1  |
| Goal-setting                                                          |                 | 11, 52     | 15, 46, 85                        | 25, 51                     |                                 |                                 | 40              | 75     |
| Focusing on improvement                                               |                 |            | 10                                | 76                         |                                 |                                 |                 |        |
| Focusing on common goals                                              |                 |            | 47                                |                            |                                 |                                 |                 | 75     |

|                                                      |                            |             |                                                        |            |        |       |       |        |
|------------------------------------------------------|----------------------------|-------------|--------------------------------------------------------|------------|--------|-------|-------|--------|
| Setting and achieving goals                          | 10, 24, 86                 |             |                                                        |            |        |       |       |        |
| Decision-making (n = 5)                              | n = 1                      |             | n = 2                                                  |            | n = 2  |       |       |        |
| Decision-making                                      | 38                         |             | 25, 47                                                 |            | 87     |       |       |        |
| Opportunities to make decisions for themselves       |                            |             |                                                        |            | 37     |       |       |        |
| Problem-solving (n = 8)                              | n = 4                      |             | n = 1                                                  |            | n = 2  |       | n = 1 |        |
| Problem-solving skills                               | 10, 21, 29, 86             |             |                                                        |            | 39     |       | 27    |        |
| Reflecting on potential solutions and solve problems |                            |             | 67                                                     |            |        |       |       |        |
| The use of problem-solving                           |                            |             |                                                        |            | 40     |       |       |        |
| Responsibility (n = 21)                              | n = 1                      | n = 9       | n = 4                                                  | n = 1      | n = 1  | n = 1 | n = 1 | n = 4  |
| Responsibility                                       | 13                         | 82a, 85, 86 | 25, 30, 74                                             |            | 8      |       |       | 27, 87 |
| Personal responsibility (for self and own actions)   |                            | 50, 66, 70  |                                                        |            |        |       |       | 22, 37 |
| Social responsibility                                |                            | 12, 50, 64  |                                                        | 7          |        | 61    |       | 22, 37 |
| Accountability                                       | 13                         | 49          | 25, 78                                                 |            |        |       |       |        |
| Leadership (n = 19)                                  | n = 12                     |             | n = 5                                                  |            | n = 2  |       |       |        |
| Leadership                                           | 15, 17, 18, 33, 73, 85, 86 |             |                                                        |            | 88     |       |       |        |
| Being a leader                                       | 10, 24, 49, 70             |             | 51, 76                                                 |            | 87, 88 |       |       |        |
| Being a role model                                   | 10, 24, 33, 49             |             |                                                        |            |        |       |       |        |
| Coaching others                                      | 10                         |             |                                                        |            |        |       |       |        |
| Leadership skills                                    | 10, 17, 79                 |             | 25, 51, 74                                             |            |        |       |       |        |
| Setting an example                                   |                            |             | 62                                                     |            |        |       |       |        |
| Taking on new roles                                  |                            |             |                                                        |            | 87     |       |       |        |
| Use of voice in leadership situations                |                            |             | 62                                                     |            |        |       |       |        |
| Cooperation (n = 35)                                 | n = 1                      | n = 1       | n = 19                                                 | n = 7      | n = 1  | n = 2 | n = 2 | n = 2  |
| Cooperation                                          |                            |             | 21, 66, 73                                             | 30, 48     |        | 35    |       |        |
| Teamwork                                             |                            | 52          | 10, 14, 15, 16, 21, 45, 53, 60, 64, 66, 70, 73, 79, 85 |            | 7      |       |       |        |
| Cooperation skills                                   |                            |             |                                                        | 72         |        | 42    | 3     |        |
| Group process skills                                 |                            |             | 86                                                     |            |        |       |       |        |
| Helping each other                                   | 4                          |             | 29                                                     | 48, 76, 78 |        |       | 61    | 37     |
| Recognizing the importance of working with others    |                            |             | 18                                                     | 57         |        |       |       |        |
| Working with people you do not necessarily like      |                            |             | 18                                                     |            |        |       |       |        |
| Interpersonal skills                                 |                            |             | 85                                                     |            |        |       |       |        |
| Playing better together as a team                    |                            |             |                                                        |            |        |       |       | 75     |

|                                                              |              |                                                  |                       |              |              |              |              |              |
|--------------------------------------------------------------|--------------|--------------------------------------------------|-----------------------|--------------|--------------|--------------|--------------|--------------|
| Team bonding and team spirit                                 |              | 49                                               | 67                    |              |              |              |              |              |
| Team effort                                                  |              | 10                                               |                       |              |              |              |              |              |
| Working cooperatively sharing resources                      |              | 29                                               |                       |              |              |              |              |              |
| Working together (e.g. to reach their goals)                 |              | 29, 47                                           | 67                    |              |              |              |              | 75           |
| <b>Meeting people and making friends (n = 27)</b>            | <b>n = 2</b> | <b>n = 21</b>                                    | <b>n = 1</b>          | <b>n = 1</b> | <b>n = 2</b> |              |              |              |
| Interacting with others (e.g. peers, coaches)                |              | 10, 17, 18, 19,<br>38, 47, 53, 64,<br>66, 70, 84 | 74                    | 31           |              |              |              |              |
| Relationships with teammates or peers                        |              | 14, 33, 45, 47,<br>50, 60, 63, 80,<br>84, 86     |                       |              |              |              |              |              |
| Creating meaningful relationships                            |              | 18                                               |                       |              | 8            |              |              |              |
| Making friends                                               | 11, 58       | 9, 18, 24, 33, 38,<br>53, 64, 66, 70,<br>79      | 74                    |              | 65           |              |              |              |
| Adult network and social capital                             |              | 14, 45                                           |                       |              |              |              |              |              |
| <b>Communication (n = 16)</b>                                |              | <b>n = 10</b>                                    | <b>n = 3</b>          |              | <b>n = 1</b> | <b>n = 1</b> | <b>n = 1</b> |              |
| Communication skills                                         |              | 1, 24, 33, 47, 50,<br>60, 70, 73                 | 25, 48, 57            |              |              | 3            |              | 75           |
| Positive communication                                       |              | 49                                               |                       |              |              |              |              |              |
| Interpersonal communication                                  |              | 21                                               |                       |              |              |              |              |              |
| Becoming more vocal                                          |              | 70                                               |                       |              |              |              |              |              |
| Maintaining a dialogue                                       |              |                                                  |                       |              | 26           |              |              |              |
| Overcoming challenges when communicating with others         |              | 24                                               |                       |              |              |              |              |              |
| <b>Prosocial behaviour (n = 54)</b>                          | <b>n = 1</b> | <b>n = 1</b>                                     | <b>n = 27</b>         | <b>n = 9</b> | <b>n = 3</b> | <b>n = 6</b> | <b>n = 4</b> | <b>n = 3</b> |
| Prosocial behaviour                                          |              |                                                  | 43, 63, 80            | 59           | 23           | 65, 68       | 69           |              |
| Taking turns                                                 |              |                                                  | 29                    | 28           |              |              |              |              |
| Raising hands, asking for permission to speak, and listening | 4            |                                                  |                       |              |              |              |              |              |
| Congratulating others                                        | 4            |                                                  |                       |              |              |              |              |              |
| Supporting, encouraging each other                           |              |                                                  | 10, 19                | 48, 78       |              |              |              |              |
| Relating to others                                           |              |                                                  | 70                    |              |              | 26           |              |              |
| Being disappointed together, being pleased together          |              |                                                  | 19                    |              |              |              |              |              |
| Feedback and compliments                                     |              |                                                  | 86                    | 28           |              |              |              |              |
| Following rules                                              | 4            |                                                  | 10                    |              |              |              |              |              |
| Handling or dealing with conflicts                           |              |                                                  | 41, 47, 64, 70,<br>73 |              |              | 26           |              | 27           |
| Honesty                                                      |              |                                                  | 15, 16, 82a           |              |              |              |              |              |

|                                                           |   |    |                                                         |               |    |        |    |            |
|-----------------------------------------------------------|---|----|---------------------------------------------------------|---------------|----|--------|----|------------|
| Integrity                                                 |   |    | 55, 82a                                                 |               |    |        |    |            |
| Appreciation                                              | 4 |    |                                                         |               |    |        |    |            |
| Expressing opinions                                       |   |    |                                                         |               |    |        | 87 |            |
| Judgment                                                  |   |    | 83a                                                     |               |    |        |    |            |
| Loyalty                                                   |   |    | 16                                                      |               |    |        |    |            |
| Ethical behaviour                                         |   |    | 64                                                      |               |    |        |    |            |
| Etiquette                                                 |   |    | 64                                                      |               |    |        |    |            |
| Fair play (e.g. handing flags back to team mates)         |   |    | 66, 79                                                  | 78            |    |        |    |            |
| Sportsmanship/sportspersonship                            |   |    | 16, 64, 66, 79                                          | 28            |    |        |    |            |
| Dealing with winning or losing in competition             |   |    | 10                                                      | 57            |    |        |    |            |
| Doing the right thing                                     |   |    | 82a                                                     |               |    |        |    |            |
| Character                                                 |   |    | 79                                                      | 2, 34, 59     | 23 |        |    |            |
| Caring                                                    |   |    | 85                                                      | 2, 25, 34, 59 | 23 |        | 61 | 88         |
| Emotional sensitivity                                     |   |    |                                                         |               |    |        | 44 |            |
| Empathy                                                   | 4 |    | 21                                                      | 25            | 36 | 26, 42 |    |            |
| Sympathy                                                  |   |    |                                                         |               | 23 |        |    |            |
| (Mutual) trust                                            |   |    | 24, 49, 73                                              |               |    |        |    | 87         |
| Moral values                                              |   |    | 16                                                      |               |    |        |    |            |
| Prosocial values/norms                                    |   |    | 9, 86                                                   | 72            |    |        |    |            |
| Respect (for self, materials, peers, coaches, referees)   | 4 | 52 | 10, 15, 16, 33, 47, 49, 50, 54, 55, 64, 70, 79, 82a, 85 | 25, 72        | 31 | 35     | 61 | 27, 87, 88 |
| Obeying or respecting authority (e.g. referee's decision) | 4 |    | 66                                                      |               |    |        |    |            |
| Tolerance                                                 |   |    |                                                         |               |    | 35     |    |            |
| Social awareness                                          |   |    | 38                                                      |               |    |        |    |            |
| Social sensitivity                                        |   |    |                                                         |               |    |        | 44 |            |
| Peer prosocial orientation                                |   |    | 80                                                      |               |    |        |    |            |
| Social adaptation                                         |   |    | 70                                                      |               |    |        | 3  |            |
| Social and peer acceptance                                |   |    | 82a                                                     | 28            | 31 | 83     |    |            |
| Negotiation/refusal skills                                |   |    | 21                                                      |               |    |        |    |            |

<sup>1</sup>Studies were labelled as cross-sectional when the data was collected from participants at one point in time (Lavrakas, 2008: 171)

*Note:* Action research (n = 1); Case study (n = 4); Cross-sectional (n = 41); Longitudinal-observational (n = 15); Pre-test, post-test, no control (n = 7); Quasi-experimental (n = 7); True experiment (n = 7); Mixed (n = 6)
